# Supplementary material for: Effect of low-frequency noise exposure on cognitive function: a systematic review and meta-analysis
Source: BMC Public Health. 2024 Jan 9;24:125. doi: 10.1186/s12889-023-17593-5 (PMC10775542; doi:10.1186/s12889-023-17593-5)
Supplement: Supplementary file 6 — Additional file 6. GRADE summary for quality of evidence from LFN associated with cognitive function. [file 12889_2023_17593_MOESM6_ESM.docx]

**Additional file 6. GRADE summary for quality of evidence from LFN associated with cognitive function.**

| **Quality assessment** | | | | | | | **No of patients** | | **Effect** | | **Quality** | **Importance** |
| --- | --- | --- | --- | --- | --- | --- | --- | --- | --- | --- | --- | --- |
|  |
| **No of studies** | **Design** | **Risk of bias** | **Inconsistency** | **Indirectness** | **Imprecision** | **Other considerations** | **LFN** | **Control** | **Relative (95% CI)** | **Absolute** |  |
| **Attentional functioning** | | | | | | | | | | | | |  |
| 5 | randomised trials | serious1 | very serious2 | no serious indirectness | serious3 | none | 213 | 205 | - | SMD 0.05 lower  (0.75 lower to 0.66 higher) |  **VERY LOW** | CRITICAL |  |
| **Executive functioning** | | | | | | | | | | | | |  |
| 7 | randomised trials | serious1 | no serious inconsistency4 | no serious indirectness | serious3 | none | 308 | 320 | - | SMD 0.06 lower  (0.22 lower to 0.1 higher) |  **LOW** | CRITICAL |  |
| **Memory** | | | | | | | | | | | | |  |
| 4 | randomised trials | serious1 | no serious inconsistency5 | no serious indirectness | very serious6 | none | 98 | 88 | - | SMD 0.09 lower  (0.38 lower to 0.2 higher) |  **VERY LOW** | CRITICAL |  |
| **Higher-order functions** | | | | | | | | | | | | |  |
| 4 | randomised trials | serious1 | no serious inconsistency7 | no serious indirectness | serious8 | none | 133 | 145 | - | SMD 0.37 lower  (0.67 to 0.07 lower) |  **LOW** | CRITICAL |  |

1 The only information about randomization methods is a statement that the study is randomized. Most information is from studies at low or unclear risk of bias.
2 There is high heterogeneity among the studies (p<0.001, I2=91%, Tau2=0.56).
3 The 95% confidence interval includes no effect and the upper or lower confidence limit crosses the minimal important difference (MID).
4 The studies exhibited no heterogeneity (p=0.58, I2=0%, Tau2=0.00)
5 The studies demonstrated no heterogeneity (p=0.90, I2=0%, Tau2=0.00).
6 The 95% confidence interval includes no effect and the upper or lower confidence limit crosses the MID and the total population size is less than 400.
7 The studies demonstrated moderate heterogeneity (p=0.24, I2=29%, Tau2=0.03).
8 The total population size is less than 400.
